# Supplementary material
Source: PubMed Central journal article supplement (PMC1794298)

A

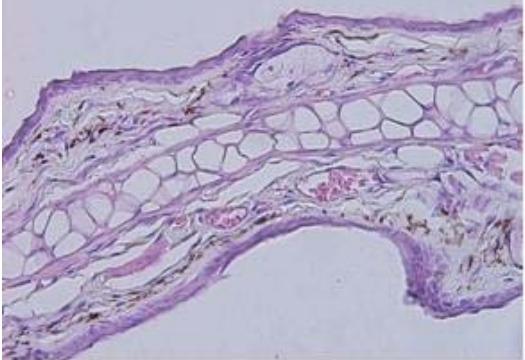

B

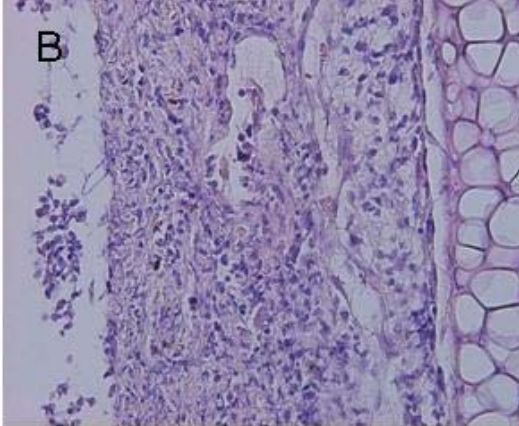

Supplement: pnas_0606490104_1.pdf [file pnas_0606490104_1.pdf]

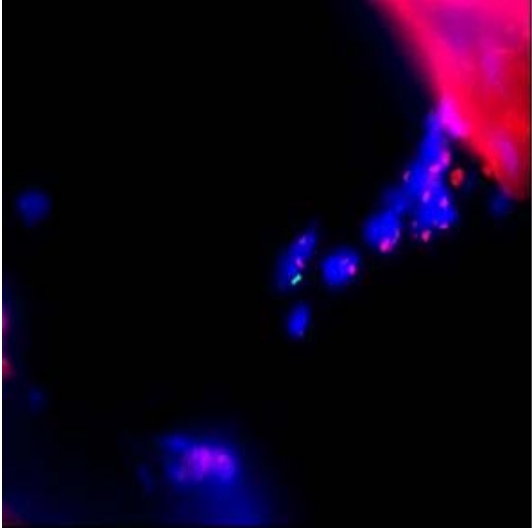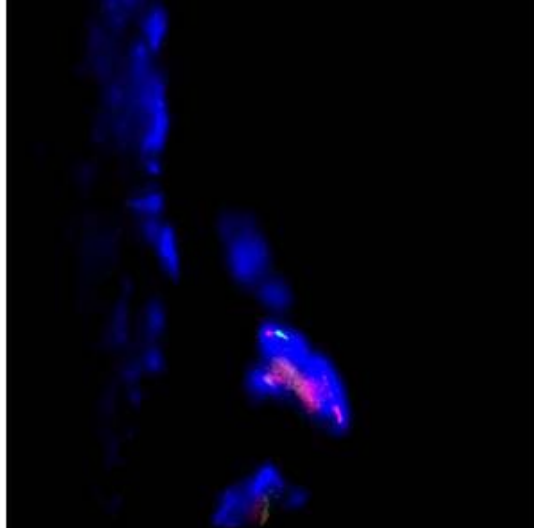

Supplement: pnas_0606490104_2.pdf [file pnas_0606490104_2.pdf]

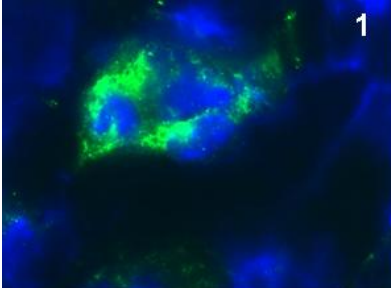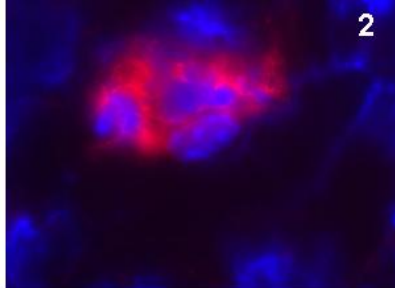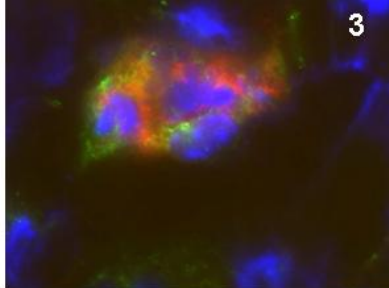

Supplement: pnas_0606490104_3.pdf [file pnas_0606490104_3.pdf]

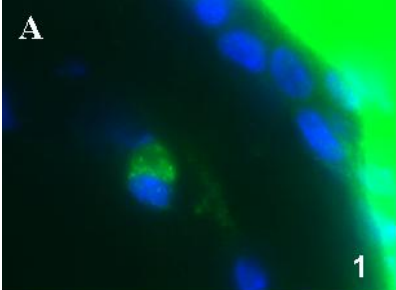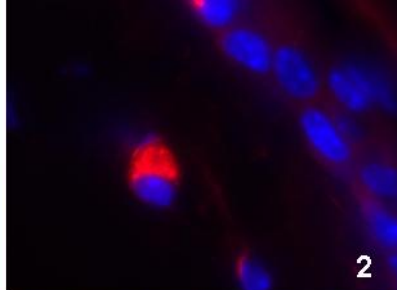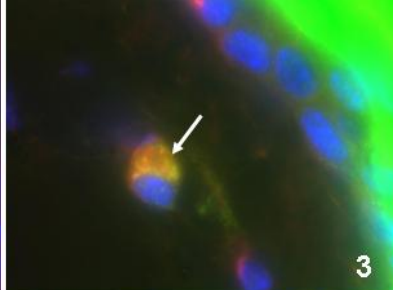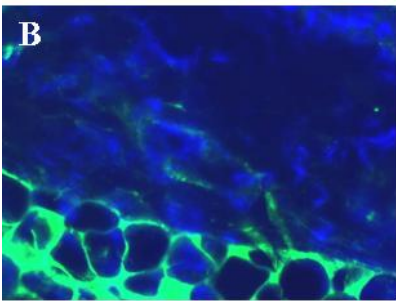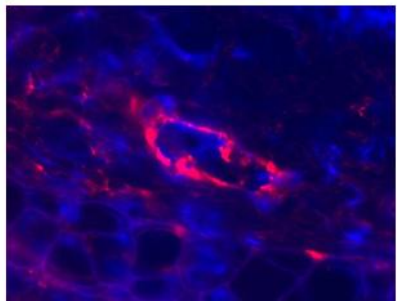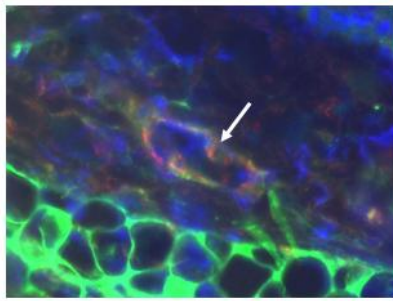

Supplement: pnas_0606490104_4.pdf [file pnas_0606490104_4.pdf]

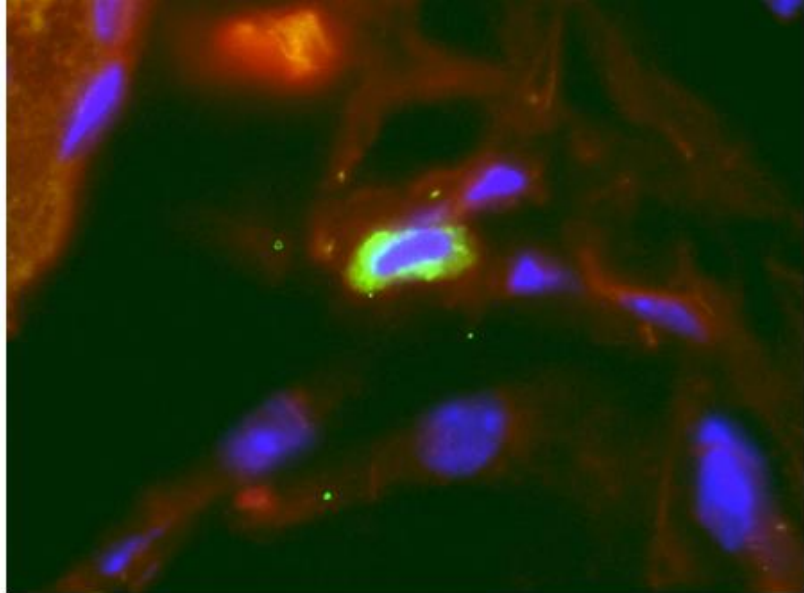

Supplement: pnas_0606490104_5.pdf [file pnas_0606490104_5.pdf]
